# Supplementary material for: The preparation of silica supported, dilute limit PdAu alloys via simultaneous strong electrostatic adsorption
Source: Royal Society of Chemistry journal article supplement (doi:10.1039/d2cy01662a), 2023-01-01
Supplement: d2cy01662a1.pdf [file d2cy01662a1.pdf]

**Supporting Information:**

**The Preparation of Silica Supported, Dilute Limit  
PdAu Alloys via**

**Simultaneous Strong Electrostatic Adsorption**

*Authors: Anhua Dong, Abolfazl Shakouri, Chris Williams, Starvros Karakalos, Doug Blom,*

*John R. Regalbuto\**

**Affiliations:** Department of Chemical Engineering, University of South Carolina, Columbia, SC,

29208

\*Correspondence to: [regalbuj@cec.sc.edu](mailto:regalbuj@cec.sc.edu)

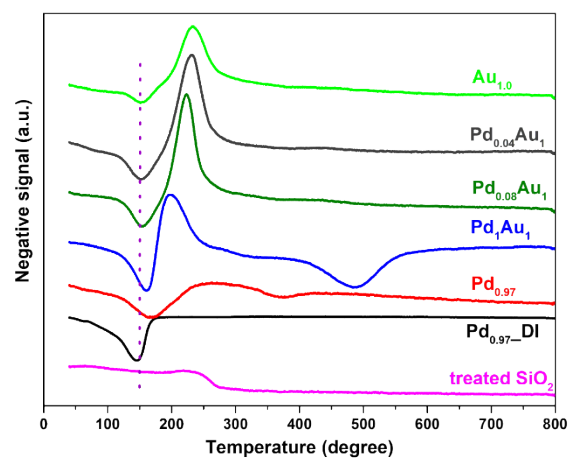

Figure S1. TPR profiles of PdAu DLA catalysts and the support.

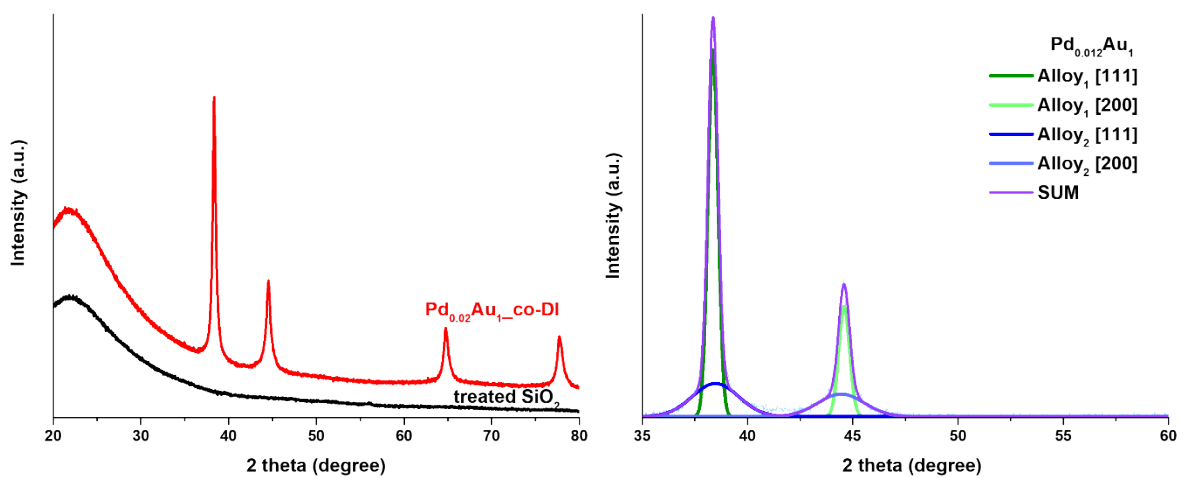

Figure S2. (a) Normalized XRD patterns for silica support and Pd<sub>0.02</sub>Au<sub>1</sub>-co-DI; (b) Deconvolution of support background subtracted X-ray patterns of Pd<sub>0.02</sub>Au<sub>1</sub>-co-DI.

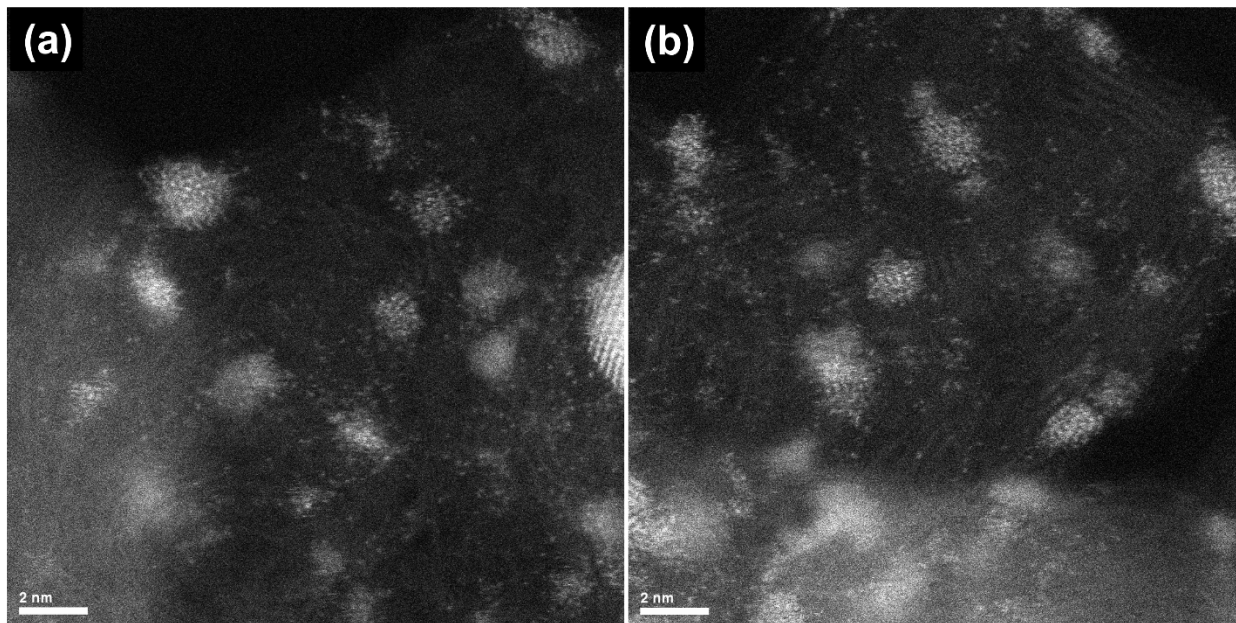

Figure 3. High magnification, high resolution STEM images of Pd<sub>1</sub>Au<sub>0.04</sub> catalyst on carbon showing the speckling of a small number of heavy Au atoms in nanoparticle matrices of Pd.

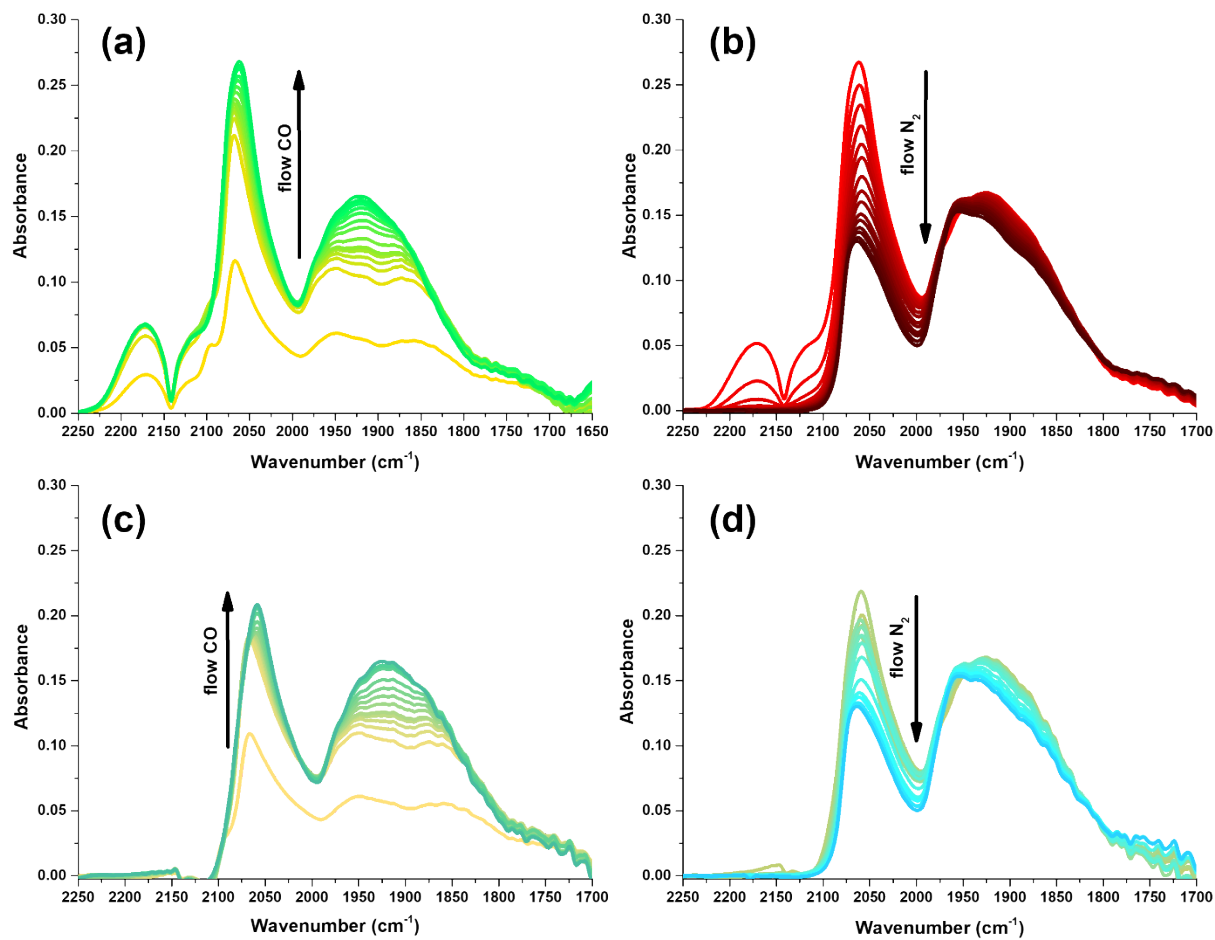

Figure 4. Time-dependent FTIR spectra over Pd<sub>1.27</sub>Au<sub>1</sub> (a) in 1% CO/Ar and (b) in the subsequent N<sub>2</sub> flow; (c-d) corresponding IR spectra subtracted CO absorbance over Au<sub>2.2</sub> pretreated and collected in the same condition.
